# Supplementary material for: Schiff base supported MCM-41 catalyzed the Knoevenagel condensation in water
Source: Royal Society of Chemistry journal article supplement (doi:10.1039/c3ra00138e), 2013-01-01
Supplement: c3ra00138e.pdf [file c3ra00138e.pdf]

# Schiff base supported MCM-41 catalyzed the Knoevenagel

## Condensation in water

Xiuzhi Dong, Yonghai Hui\*, Shaolei Xie, Peng Zhang, Guangpeng Zhou, Zhengfeng Xie\*

Key Laboratory of Oil & Gas Fine Chemicals, Ministry of Education, Xinjiang University, Urumqi

830046, People's Republic of China.

Fax : (+86)-991-8581-018

E-mail: [xiezhf72@yahoo.com.cn](mailto:xiezhf72@yahoo.com.cn); [hyhai97@yahoo.com.cn](mailto:hyhai97@yahoo.com.cn)

## Supporting Information

### Table of contents

|                                     |        |
|-------------------------------------|--------|
| General information                 | S2     |
| Experimental Section                | S2-S3  |
| Analytical data of all the products | S3-S4  |
| Spectra and Reference               | S5-S11 |

**General Information.** All the commercial available reagents and the anhydrous solvents were purchased from Aladdin and used without further purification. The samples were analyzed using FT-IR spectroscopy (using a Bruker equinox 55 in KBr matrix in the range of 4000–400  $\text{cm}^{-1}$ ). The X-ray powder diffraction (XRD) of the catalysts was carried out on a instrument (Rigaku R-axis Spider, Japan) using nickel filtered Cu K $\alpha$  radiation. Scanning electron microscope (SEM) studies were performed on LEO1430VP, Germany. Transmission electron microscope (TEM) images were obtained from a (Hitachi H-600, Japan) instrument.  $^1\text{H}$ NMR spectra were recorded on an INOVA 400 MHz FT-NMR spectrometer, using  $\text{CDCl}_3$  as solvent and TMS as internal reference (chemical shifts, in ppm).  $^{13}\text{C}$ NMR spectra were collected at INOVA 400 MHz FT-NMR spectrometer, using  $\text{CDCl}_3$  as solvent and TMS as internal reference (chemical shifts, in ppm). Mass spectroscopy data of the product was collected at a Hewlett-Packard HP1100 LC/MSD instrument. Purification of reaction products were carried out by column chromatography using Qingdao silica gel (300-400 mesh). Analytical thin-layer chromatography (TLC) was performed on silica gel GF254 (Qingdao, China) with ethyl acetate and petroleum ether (60-90 °C). Melting points were determined on an Elemental digital melting points apparatus and were uncorrected.

## Experimental Section

General procedure for the synthesis of Schiff base supported MCM-41

The preparation of  $\mathbf{L}_1$  and  $\mathbf{L}_2$  were performed according to the previous literature<sup>1</sup>.  $\mathbf{L}_3$  was prepared by the reaction of  $\mathbf{L}_2$  (1 g) and 2-phenyl-2H-1,2,3-triazole-4-carbaldehyde (2 mmol) in ethanol (40 mL) in the presence of glacial acetic acid. Afterwards, this mixture was refluxed for 24 h, with continuous stirring, under dry nitrogen atmosphere. The solution was cooled to room temperature and the powder was filtered, washed with diethyl ether and dichloromethane.

General procedure for the synthesis of  $\alpha,\beta$ -unsaturated dicyanides (**2a** as an example)

The reaction mixture of benzaldehyde (75  $\mu$ L, 0.75 mmol), malononitrile (0.033 g, 0.5 mmol), **L**<sub>3</sub> (0.005 g) was stirred at room temperature in water (1.5 mL) for 3 h. The mixture was extracted with dichloromethane (5 $\times$ 5 mL). Notably, the catalyst was still kept in the water phase and then the water phase was directly used for the next cycle. The combined organic phase was dried over anhydrous Na<sub>2</sub>SO<sub>4</sub>, filtered and concentrated by evaporation. The crude product was purified by Column chromatography on silica gel (petroleum ether/ethyl acetate 30:1) to give product **2a** (76.3 mg, 99%) as a white solid.

#### Physical data of compounds isolated

**2a**: White solid: M.p. = 87-89 °C; <sup>1</sup>H NMR (400 MHz, CDCl<sub>3</sub>):  $\delta$  = 7.92 (m, 2H), 7.78 (s, 1H), 7.64 (m, 1H), 7.55 (m, 2H).

**2b**: White solid: M.p. = 133-134 °C; <sup>1</sup>H NMR (400 MHz, CDCl<sub>3</sub>):  $\delta$  = 7.81 (m, 2H), 7.72(s, 1H), 7.34 (m, 2H), 2.46 (s, 3H).

**2c**: Yellow solid: M.p. = 88-89 °C; <sup>1</sup>H NMR (400 MHz, CDCl<sub>3</sub>):  $\delta$  = 8.31 (s, 1H), 8.19 (m, 1H), 7.58 (m, 1H), 7.08 (m, 1H), 6.09 (m, 1H), 3.92 (s, 3H).

**2d**: White solid: M.p. = 106-107 °C; <sup>1</sup>H NMR (400 MHz, CDCl<sub>3</sub>):  $\delta$  = 7.74 (s, 1H), 7.45 (m, 3H), 7.18 (m, 1H), 3.86 (s, 3H).

**2e**: Yellow solid: M.p. = 117-119 °C; <sup>1</sup>H NMR (400 MHz, CDCl<sub>3</sub>):  $\delta$  = 7.91 (m, 2H), 7.65 (s, 1H), 7.01 (m, 2H), 3.91 (s, 3H).

**2f**: White solid: M.p. = 159-160 °C; <sup>1</sup>H NMR (400 MHz, CDCl<sub>3</sub>):  $\delta$  = 7.85 (m, 2H), 7.73 (s, 1H), 7.52 (m, 2H).

**2g**: White solid: M.p. = 165-167 °C; <sup>1</sup>H NMR (400 MHz, CDCl<sub>3</sub>):  $\delta$  = 7.77 (m, 2H), 7.70 (m, 3H).

**2h**: White solid: M.p. = 129-130 °C; <sup>1</sup>H NMR (400 MHz, CDCl<sub>3</sub>):  $\delta$  = 7.96 (m, 2H), 7.75 (s, 1H), 7.24 (m, 2H).

**2i**: Yellow solid: M.p. = 73-75 °C; <sup>1</sup>H NMR (400 MHz, CDCl<sub>3</sub>):  $\delta$  = 7.80 (m, 1H), 7.51 (s, 1H), 7.37 (m, 1H), 6.72 (m, 1H).

**2j**: Yellow solid: M.p. = 160-161 °C;  $^1\text{H}$  NMR (400 MHz,  $\text{CDCl}_3$ ):  $\delta$  = 8.52 (s, 1H), 8.13 (m, 2H), 8.0 (s, 1H), 7.51 (m, 3H);  $^{13}\text{C}$  NMR (100 MHz,  $\text{CDCl}_3$ ):  $\delta$  = 147.91, 141.25, 138.71, 137.54, 129.68, 129.55, 128.49, 119.57, 112.77, 112.14; MS:  $m/z$  = 222.1 [M+1], 246.2 [M+Na].

**2k**: Yellow solid: M.p. = 172-173 °C;  $^1\text{H}$  NMR (400 MHz,  $\text{CDCl}_3$ ):  $\delta$  = 8.65 (s, 1H), 8.27 (m, 1H), 8.11 (m, 1H), 7.96 (m, 2H), 7.51 (m, 3H).

Compound 2a

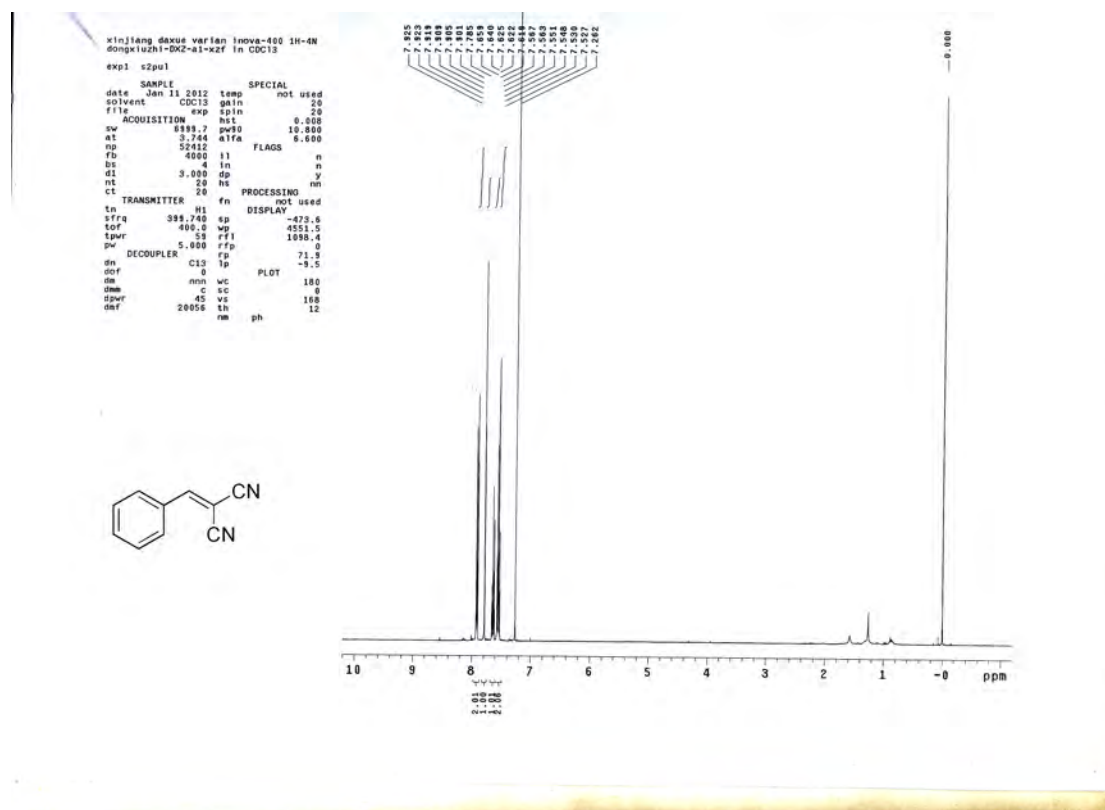

Compound 2b

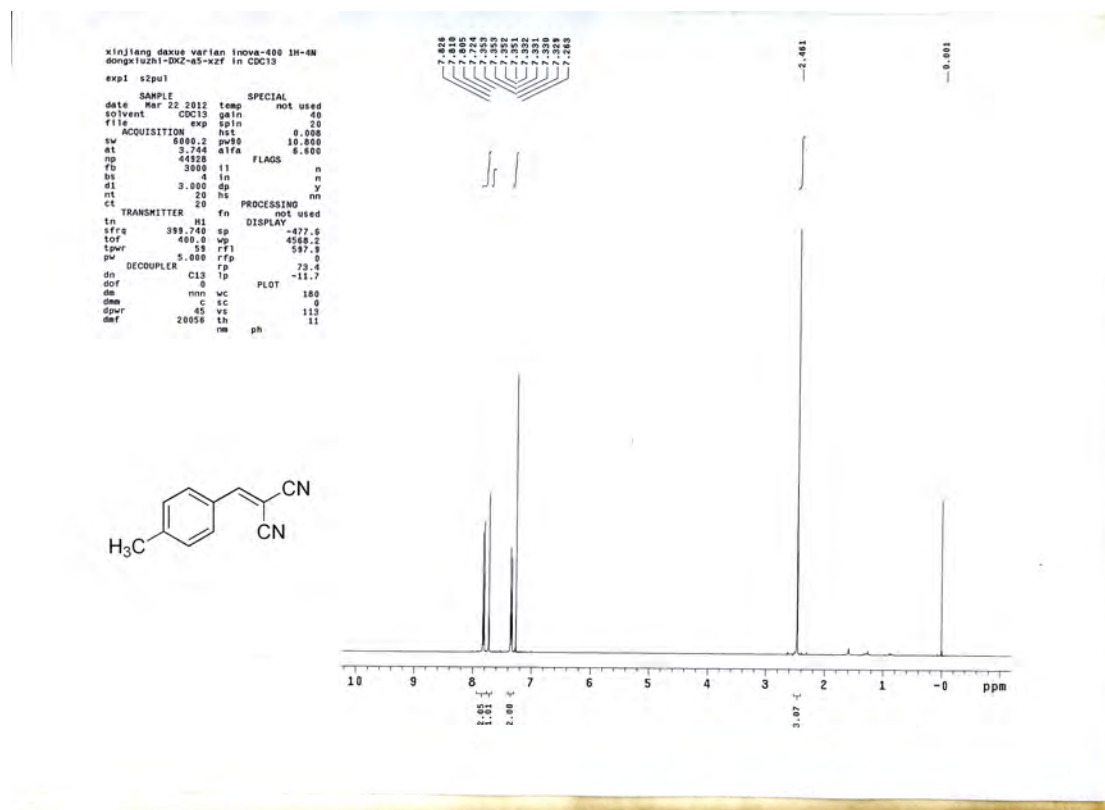

### Compound 2c

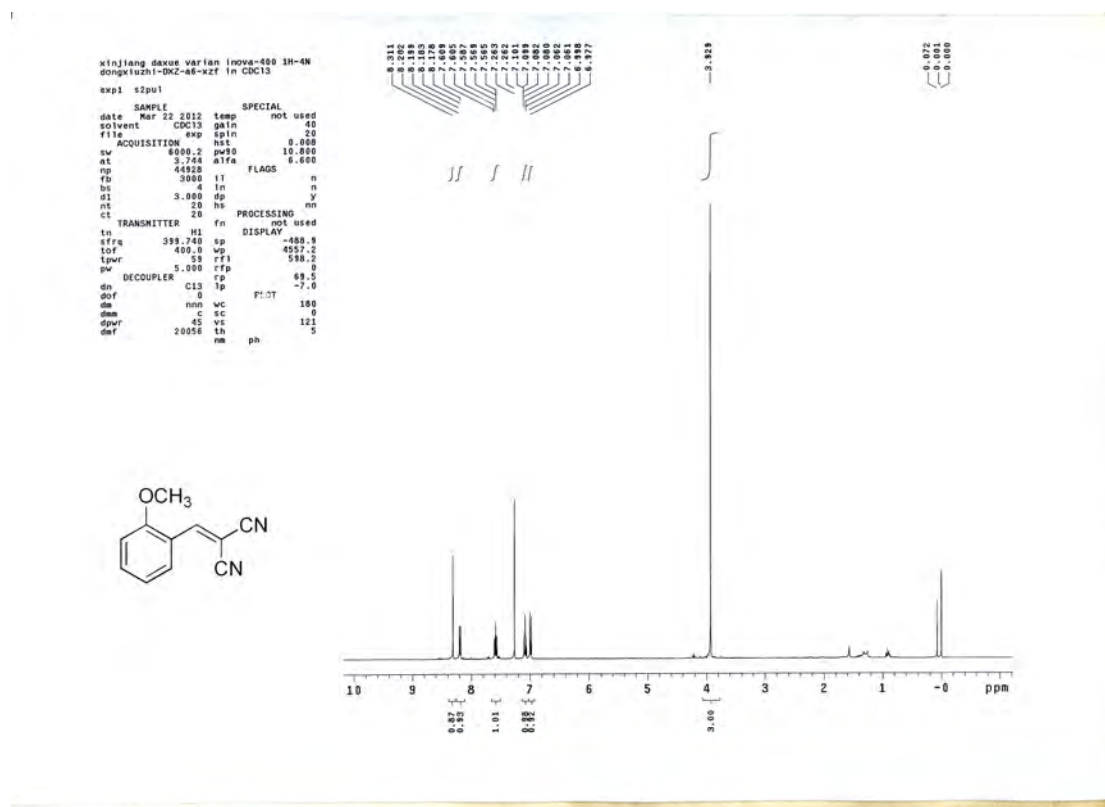

### Compound 2d

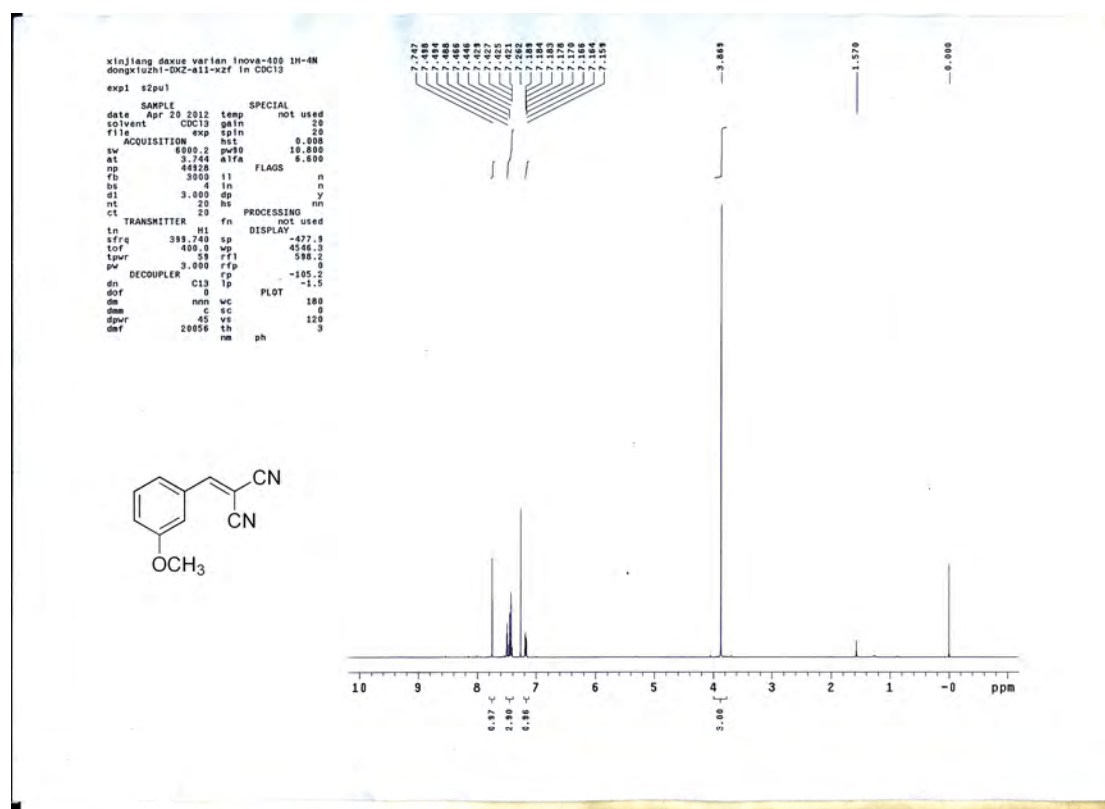

Compound **2e**

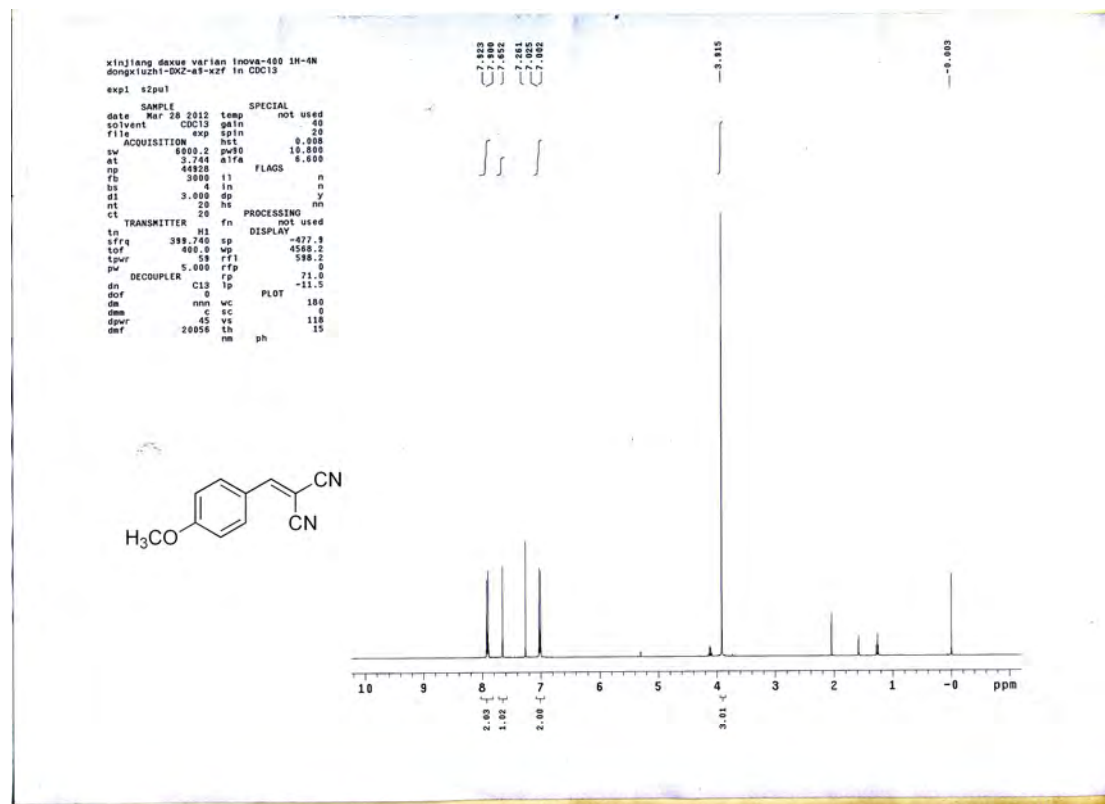

Compound **2f**

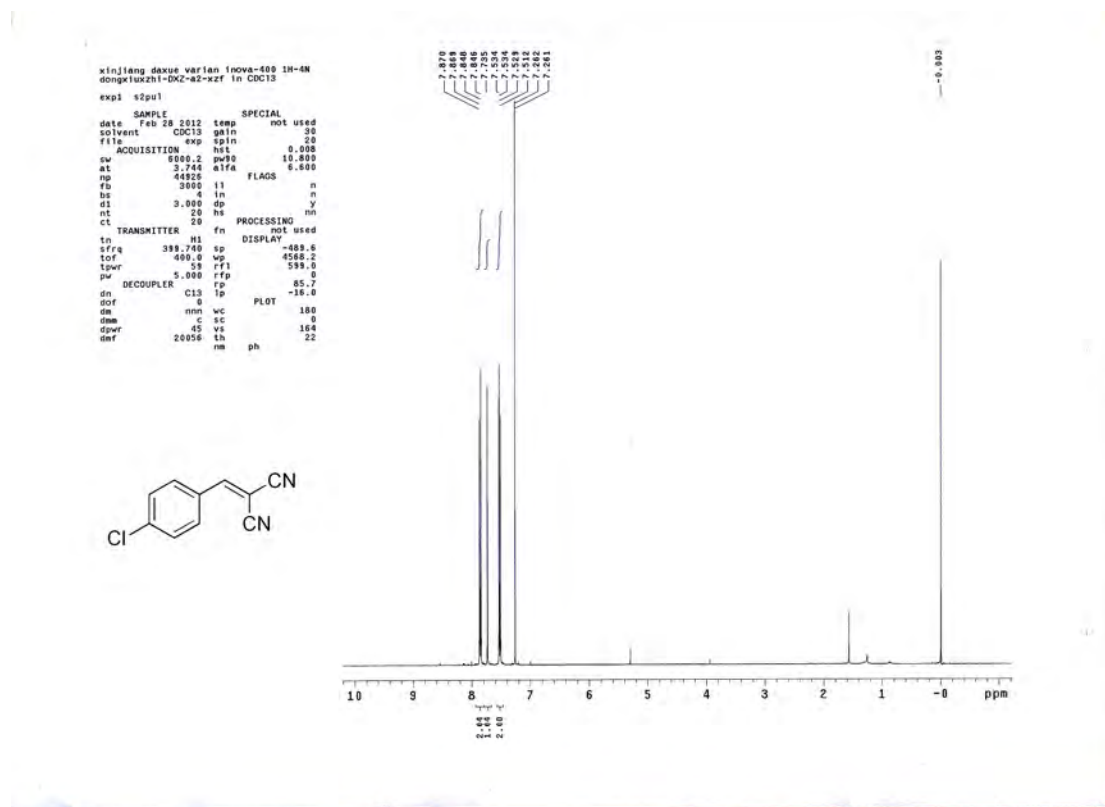

### Compound 2g

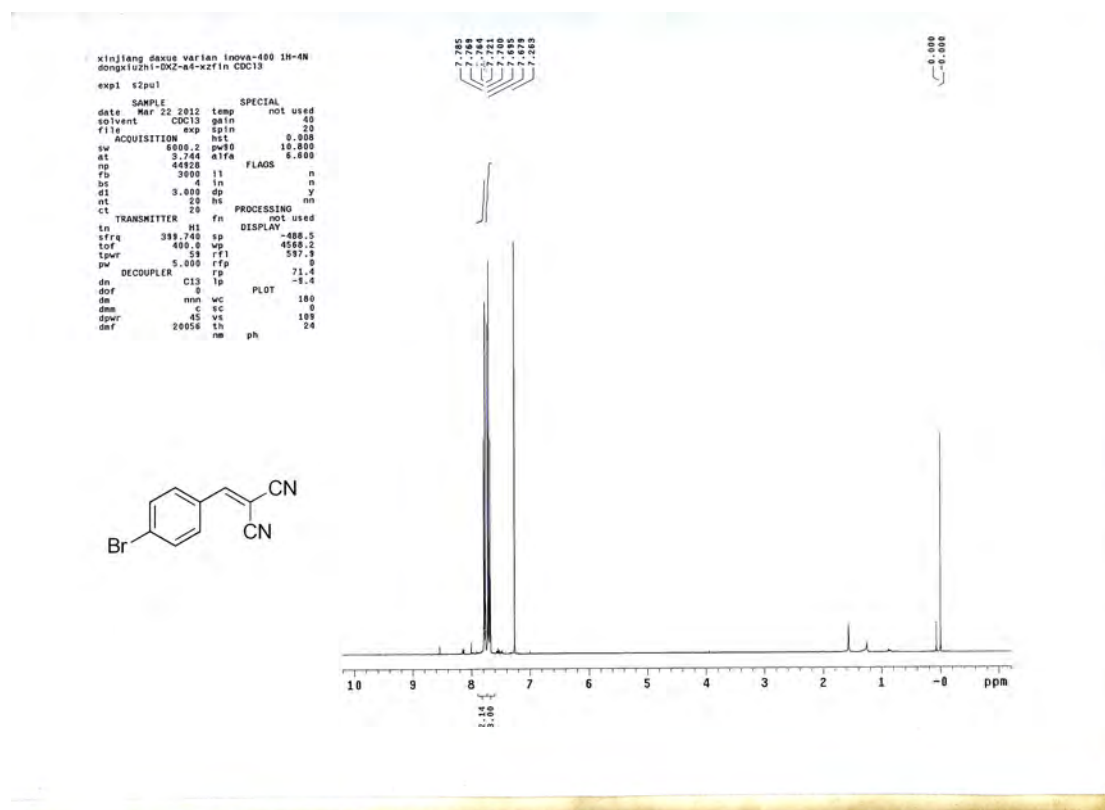

### Compound 2h

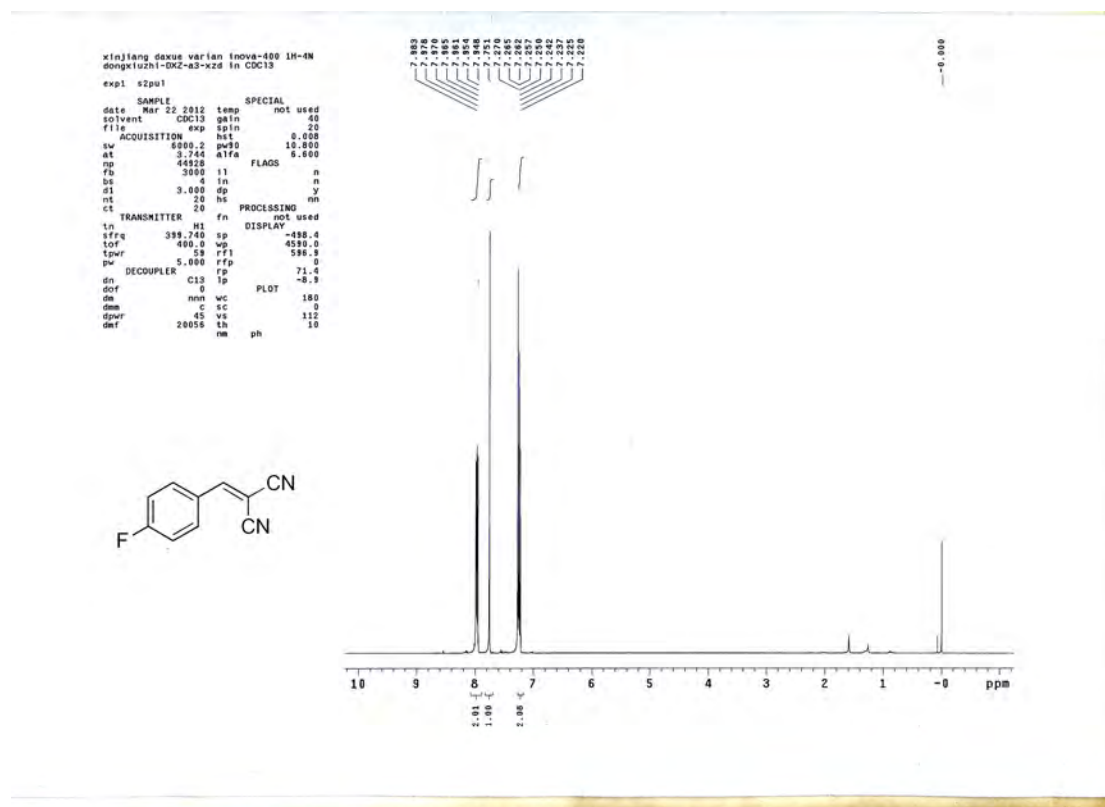



Compound 2i

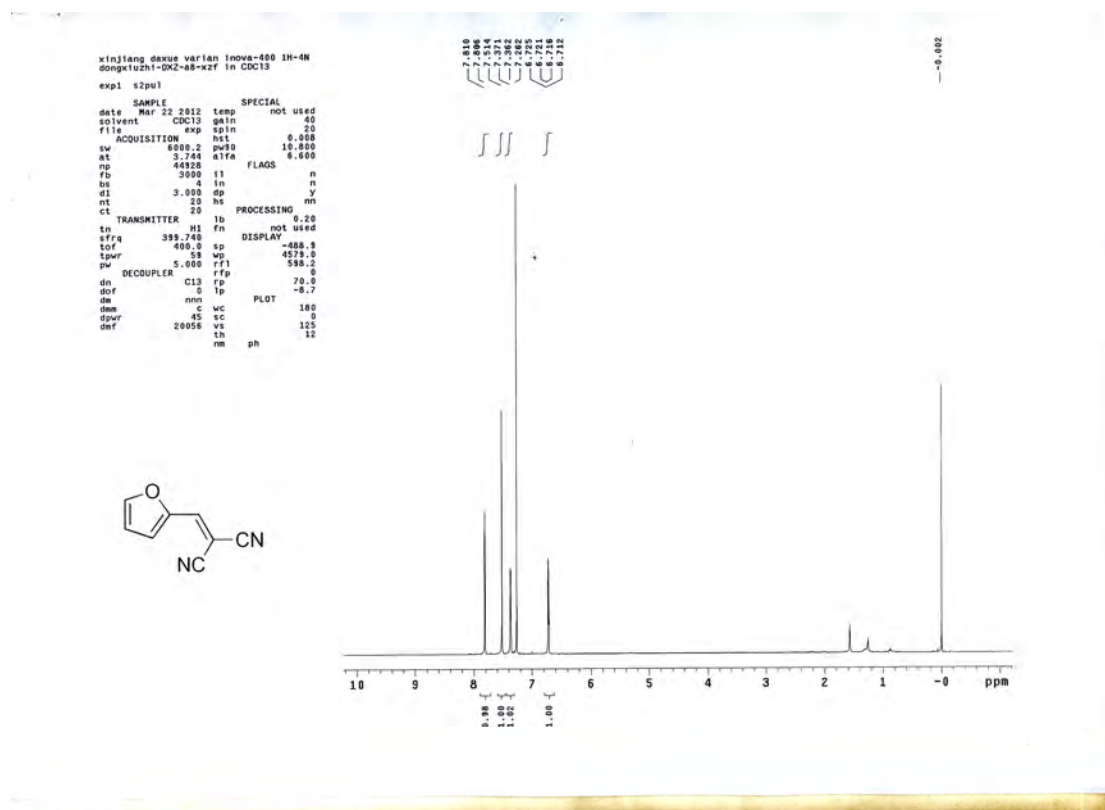

Compound 2j

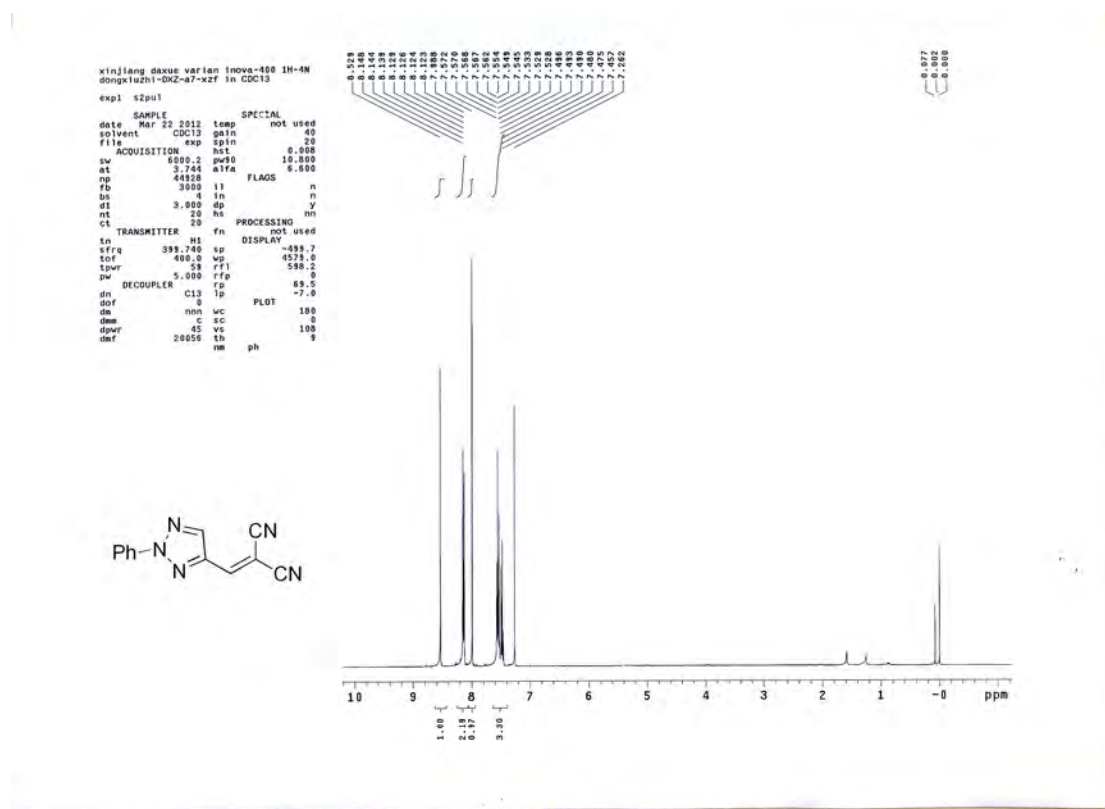

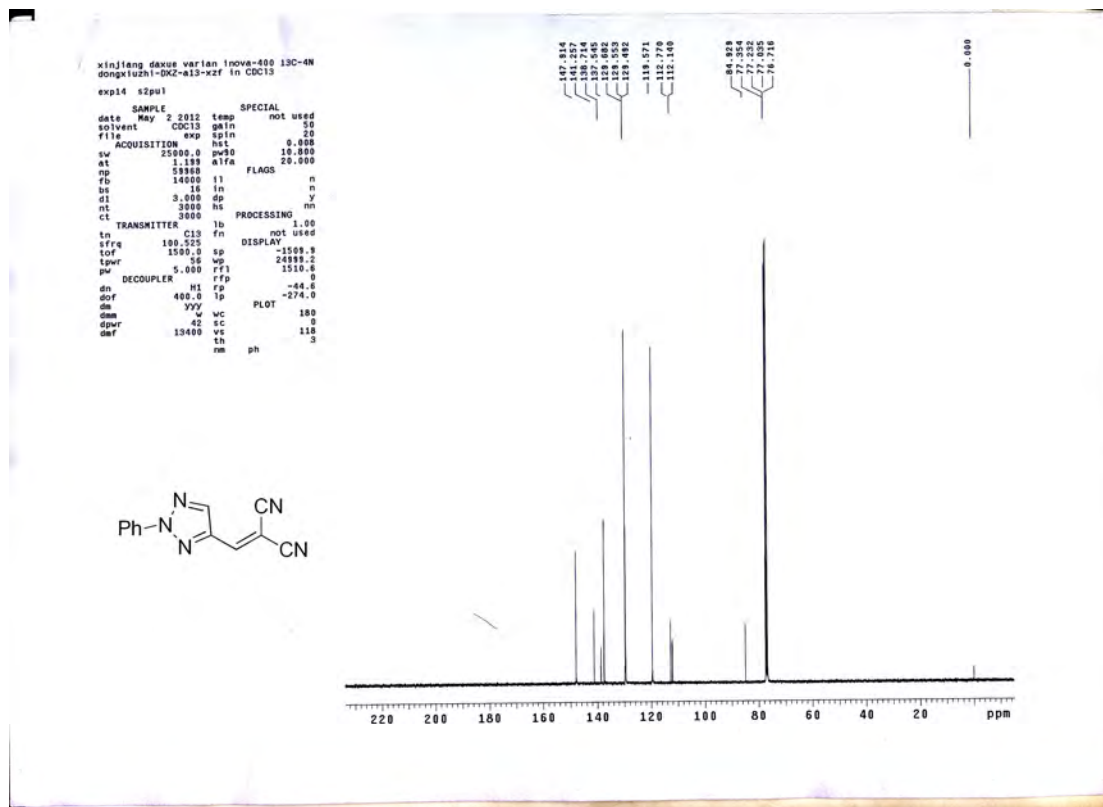

Print of window 80: MS Spectrum

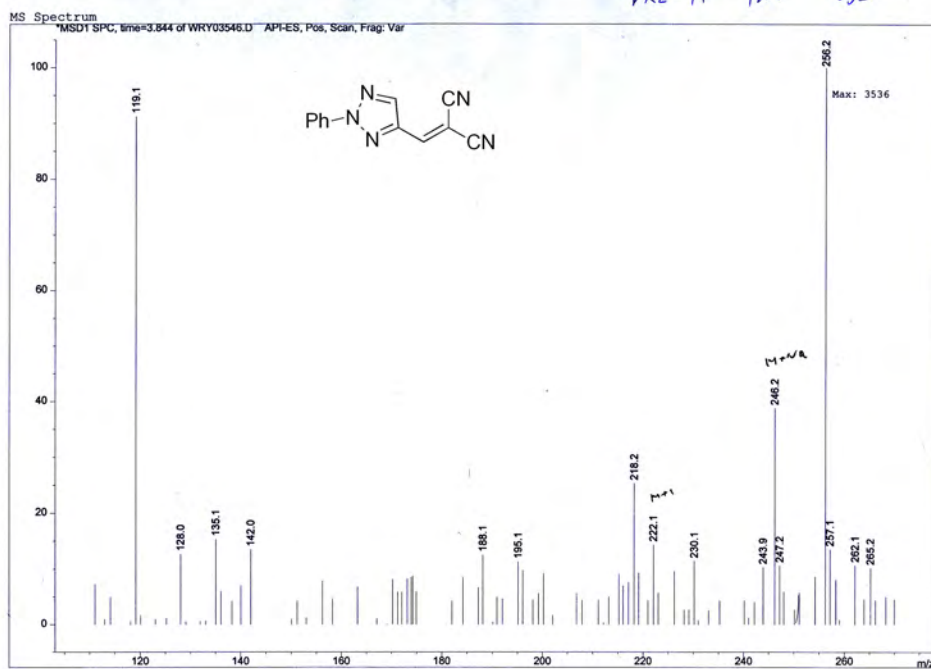

Instrument 1 5/10/2012 2:18:56 PM wangruiyang

Page 1 of 1

## Compound 2k

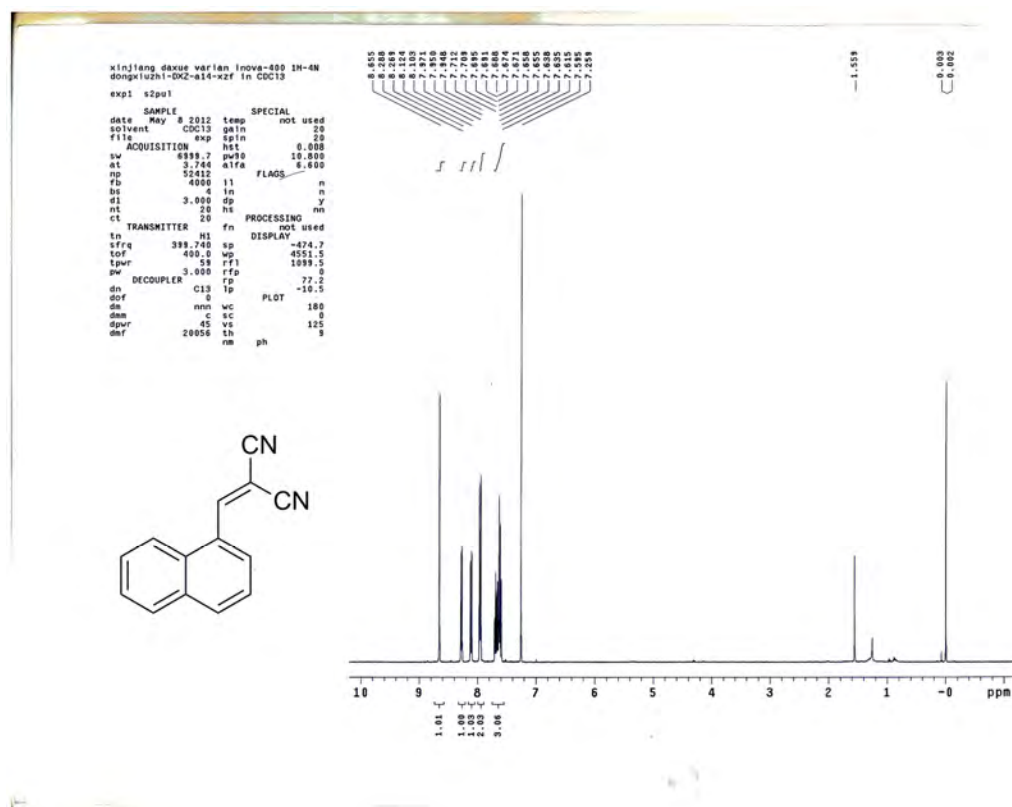

## Reference

- 1 P. Oliveira, A. Machado, A. M. Ramos, I. Fonseca, F. M. Braz Fernandes, A. M. Botelho do Rego and J. Vital, *Microporous and Mesoporous Mater.*, 2009, 120, 432.
